# Supplementary material
Source: PubMed Central journal article supplement (PMC5893388)

uncropped western blots for data shown in Figure 7

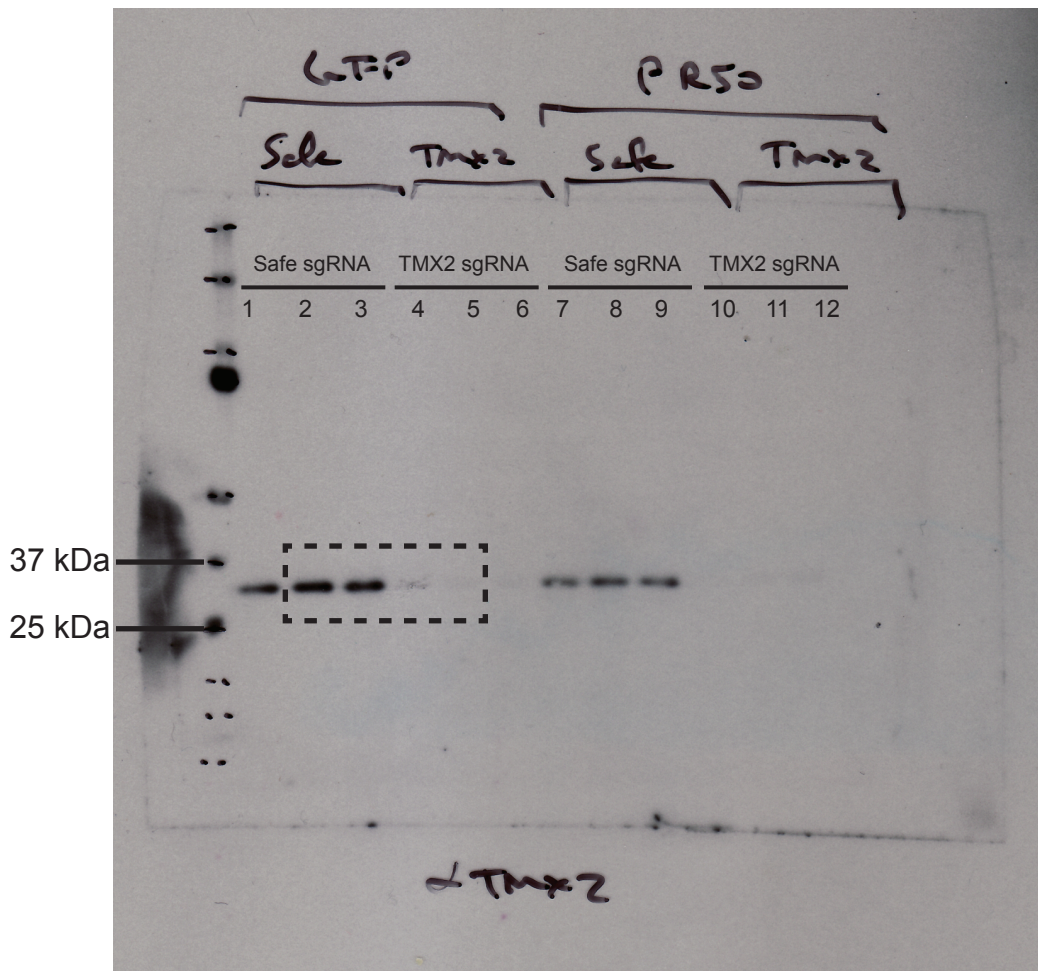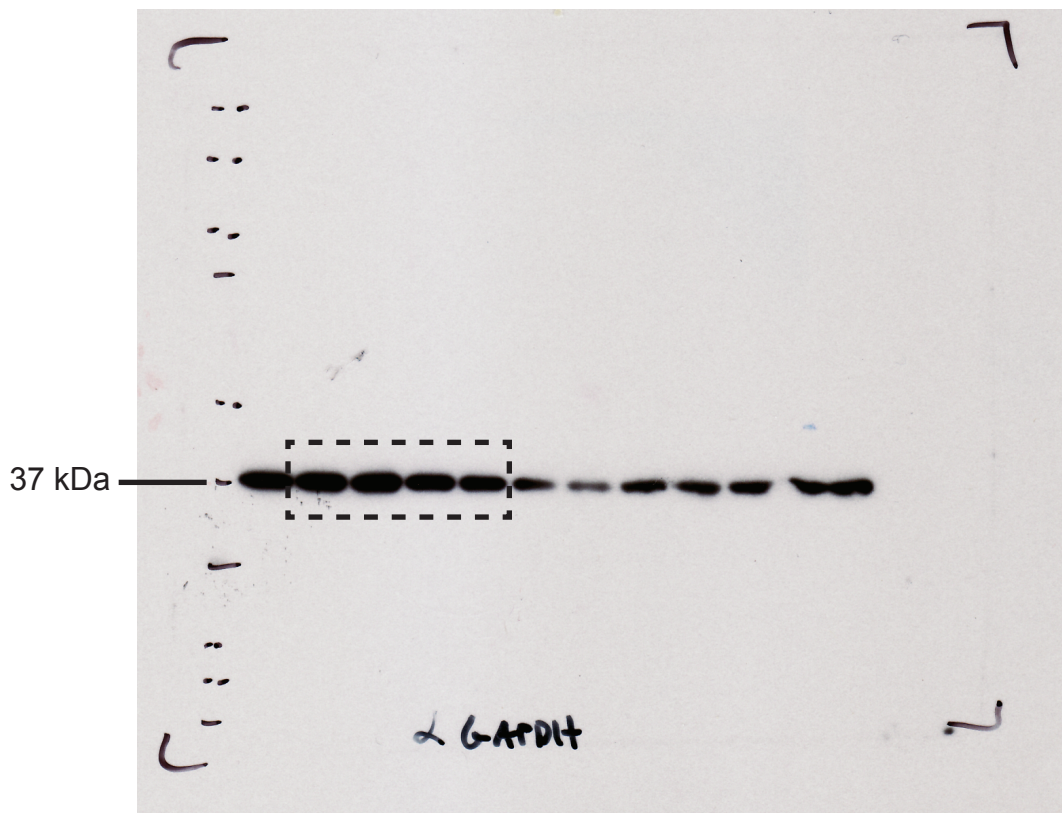

Supplement: NIHMS937439-supplement-2.pdf [file NIHMS937439-supplement-2.pdf]
